# Supplementary material for: Constraint-Based Model of Shewanella oneidensis MR-1 Metabolism: A Tool for Data Analysis and Hypothesis Generation
Source: PubMed Central journal article supplement (PMC2891590; doi:10.1371/journal.pcbi.1000822), 2010-06-24
Supplement: pcbi.1000822.s011.pdf [file pcbi.1000822.s011.pdf]

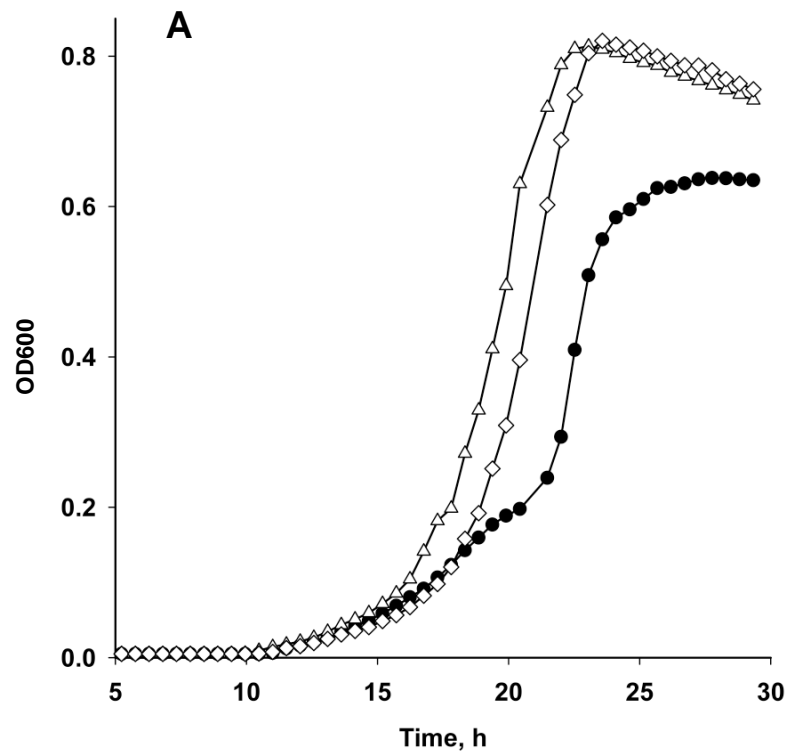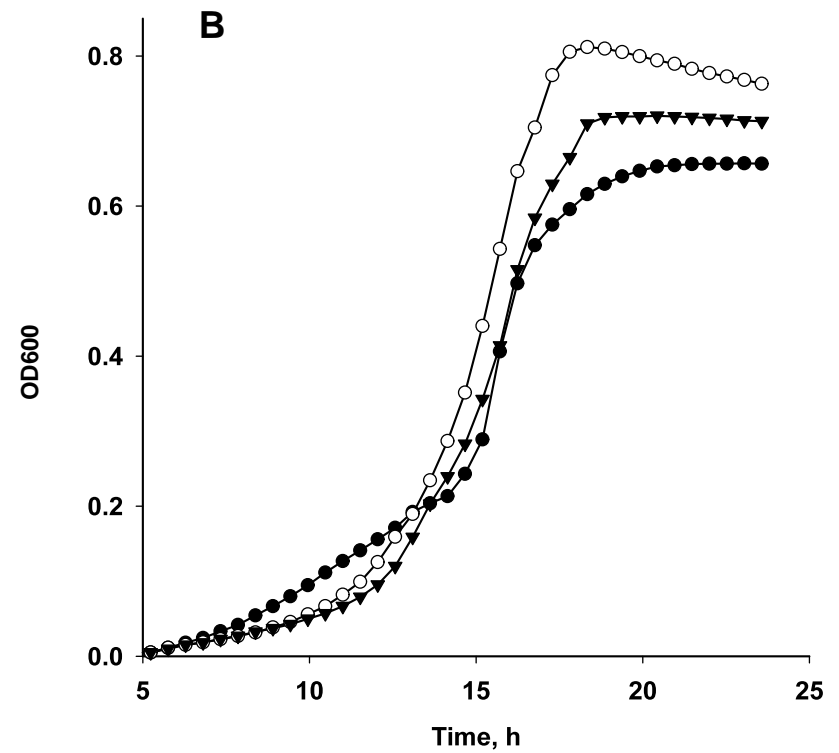

Figure S1. Growth dynamics of *S. oneidensis* MR-1 wild-type (●), and selected deletion mutants. Panel A:  $\Delta SO3855$  (Δ) and  $\Delta SO4118$  (◊). Panel B:  $\Delta SO4606$  (○) and (▼) double mutant  $\Delta SO4606/SO2363$ . Cells were cultivated in 100-well plates in Bioscreen C; each well (550  $\mu$ l total volume) received 100  $\mu$ l of M1 medium supplemented with 20 mM D,L-lactate.
