# Supplementary material for: Constraint-Based Model of Shewanella oneidensis MR-1 Metabolism: A Tool for Data Analysis and Hypothesis Generation
Source: PubMed Central journal article supplement (PMC2891590; doi:10.1371/journal.pcbi.1000822), 2010-06-24
Supplement: pcbi.1000822.s012.pdf [file pcbi.1000822.s012.pdf]

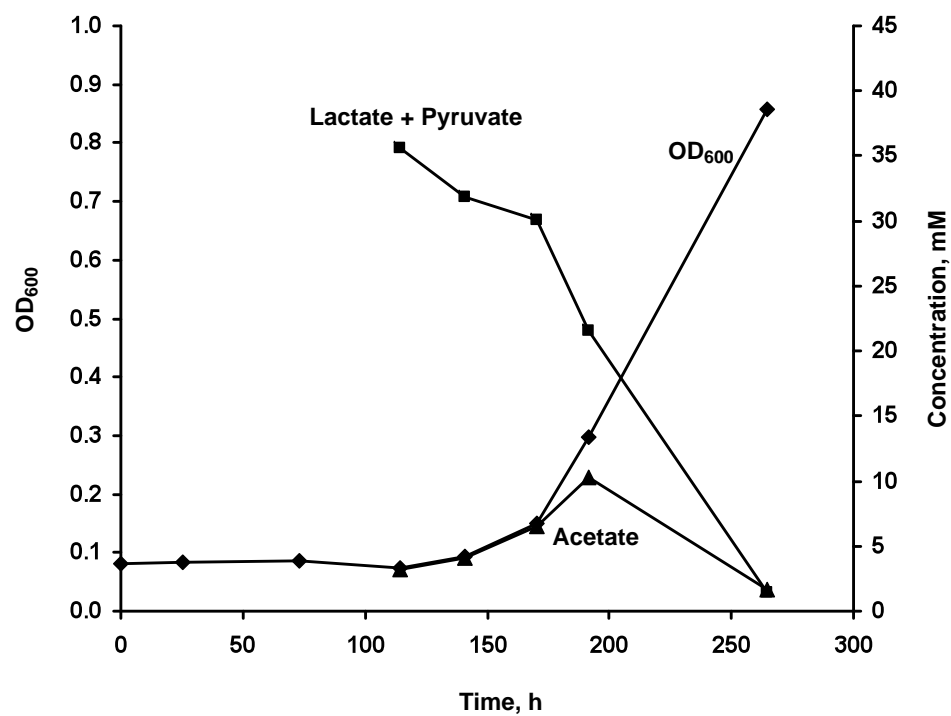

Figure S2. Growth of *S. oneidensis* MR-1  $\Delta$ SO3471 mutants on lactate (45 mM) in M1 medium and organic acids concentration dynamics. Cells were added in the beginning to make final optical density 0.08 at 600 nm. Crimp-sealed serum bottles were used for cultivation
