# Supplementary material for: Constraint-Based Model of Shewanella oneidensis MR-1 Metabolism: A Tool for Data Analysis and Hypothesis Generation
Source: PubMed Central journal article supplement (PMC2891590; doi:10.1371/journal.pcbi.1000822), 2010-06-24
Supplement: pcbi.1000822.s013.pdf [file pcbi.1000822.s013.pdf]

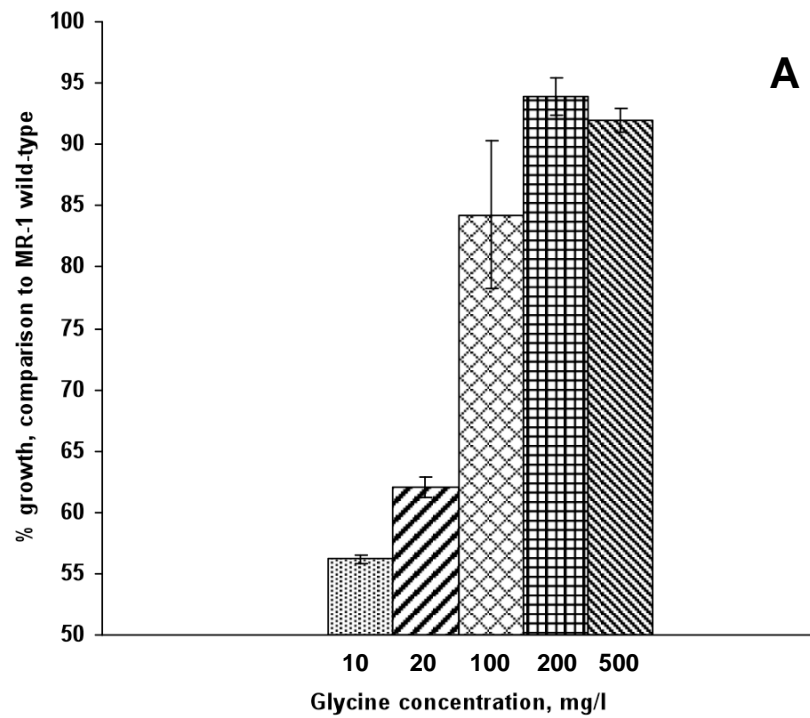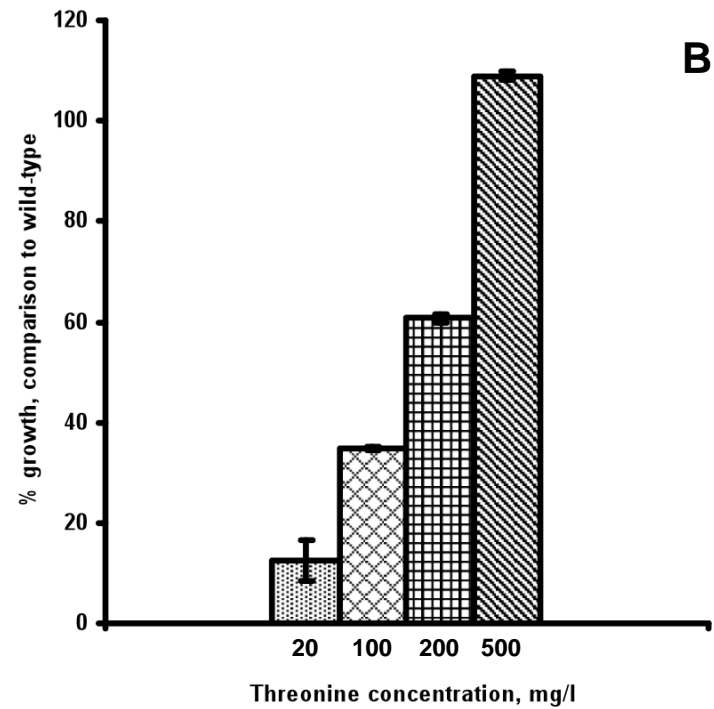

Figure S3. Influence of glycine (A) and threonine (B) additions on maximal accumulation of *S. oneidensis* MR-1  $\Delta SO3471$  biomass on lactate (45 mM) in M1 medium. Biomass accumulation was expressed as optical density at 600 nm. Crimp-sealed serum bottles were used for cultivation.
