# Supplementary material for: Constraint-Based Model of Shewanella oneidensis MR-1 Metabolism: A Tool for Data Analysis and Hypothesis Generation
Source: PubMed Central journal article supplement (PMC2891590; doi:10.1371/journal.pcbi.1000822), 2010-06-24
Supplement: pcbi.1000822.s014.pdf [file pcbi.1000822.s014.pdf]

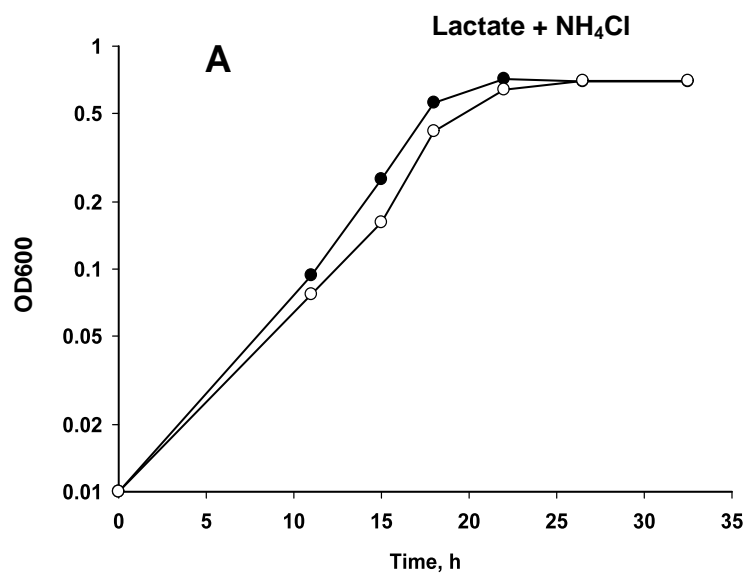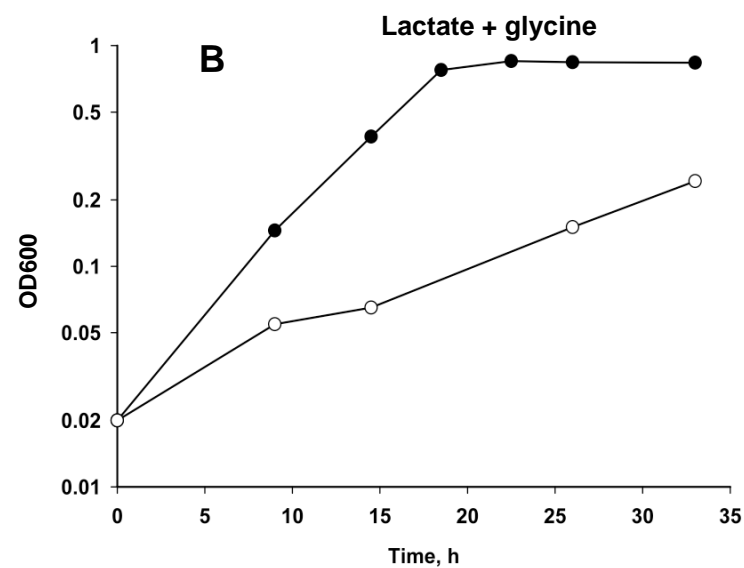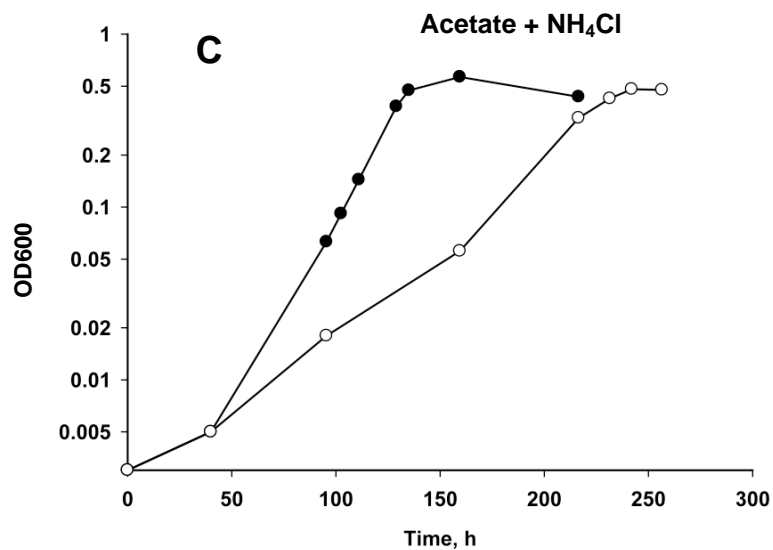

Figure S4. Growth dynamics of *S. oneidensis* MR-1 wild-type and selected deletion mutants. Wild-type (●) and  $\Delta SO0781$  (○) deletion mutant were grown on lactate (18 mM) or acetate (45 mM) in M1 medium supplemented with NH<sub>4</sub>Cl or glycine (10 mM) as the sole source of nitrogen. Crimp-sealed serum bottles were used for cultivation, starting OD<sub>600</sub> values were 0.01 (A and B) and 0.003 (C).
