# Supplementary material for: Constraint-Based Model of Shewanella oneidensis MR-1 Metabolism: A Tool for Data Analysis and Hypothesis Generation
Source: PubMed Central journal article supplement (PMC2891590; doi:10.1371/journal.pcbi.1000822), 2010-06-24
Supplement: pcbi.1000822.s015.pdf [file pcbi.1000822.s015.pdf]

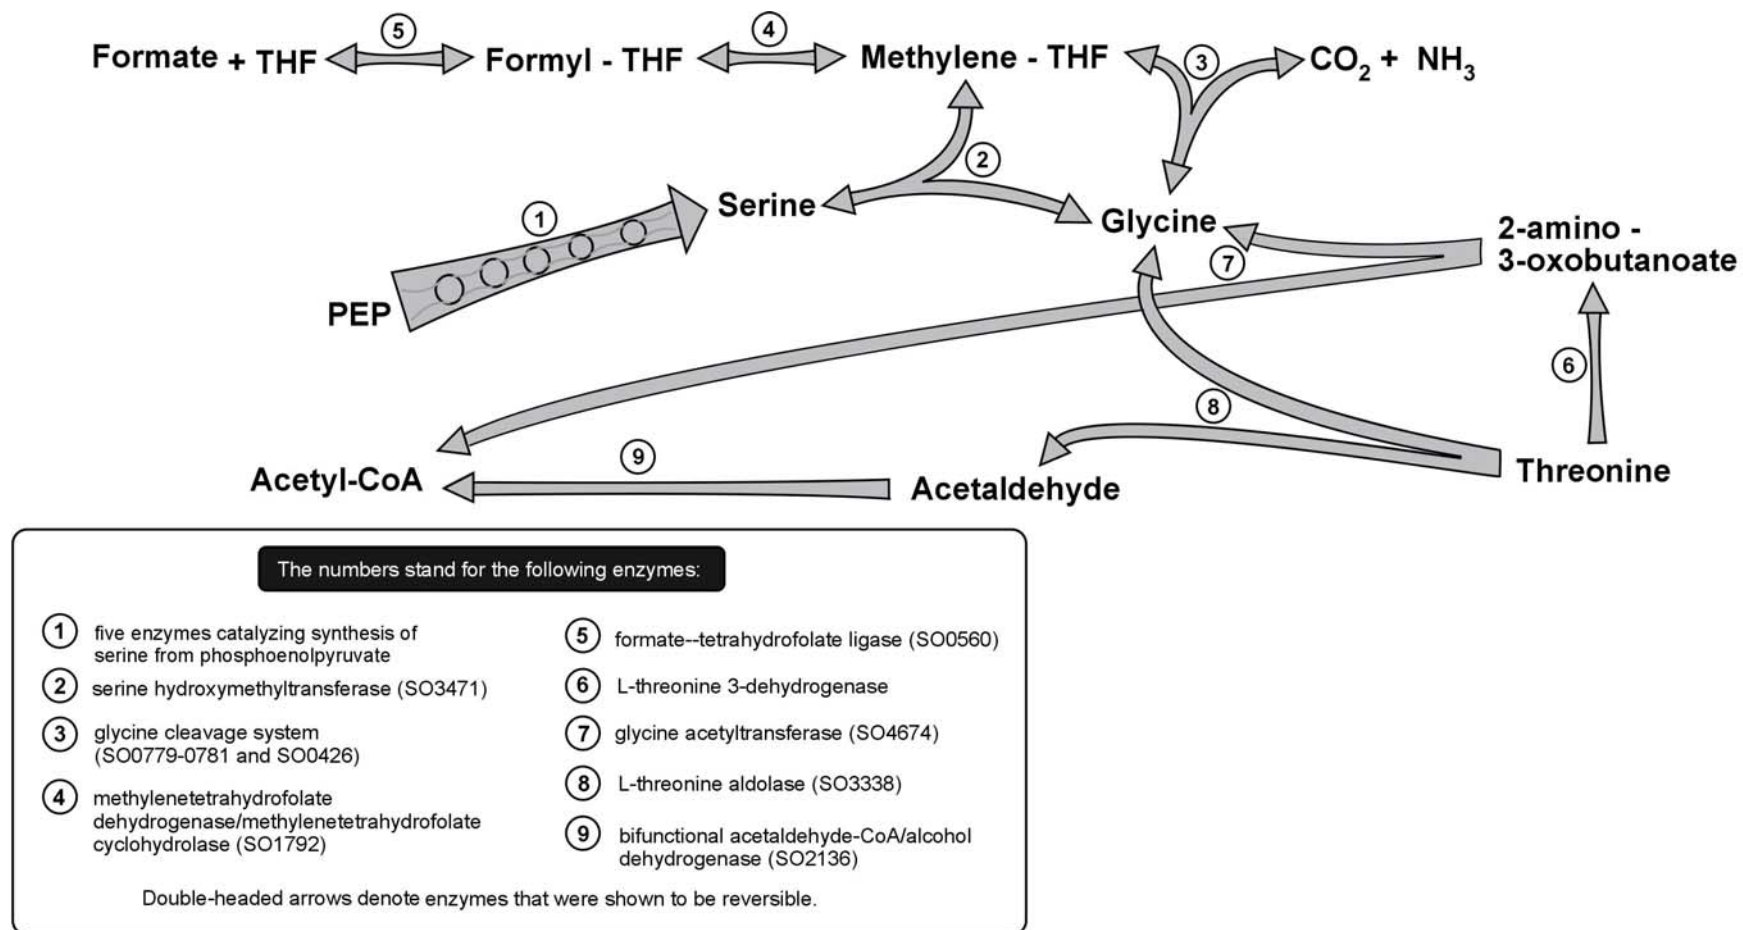

Figure S5. Metabolic network for interconversion of C1-compounds and biosynthesis/degradation of relevant amino acids in *S. oneidensis* MR-1. The network was constructed based on genome annotation.
