# Supplementary material for: Constraint-Based Model of Shewanella oneidensis MR-1 Metabolism: A Tool for Data Analysis and Hypothesis Generation
Source: PubMed Central journal article supplement (PMC2891590; doi:10.1371/journal.pcbi.1000822), 2010-06-24
Supplement: pcbi.1000822.s016.pdf [file pcbi.1000822.s016.pdf]

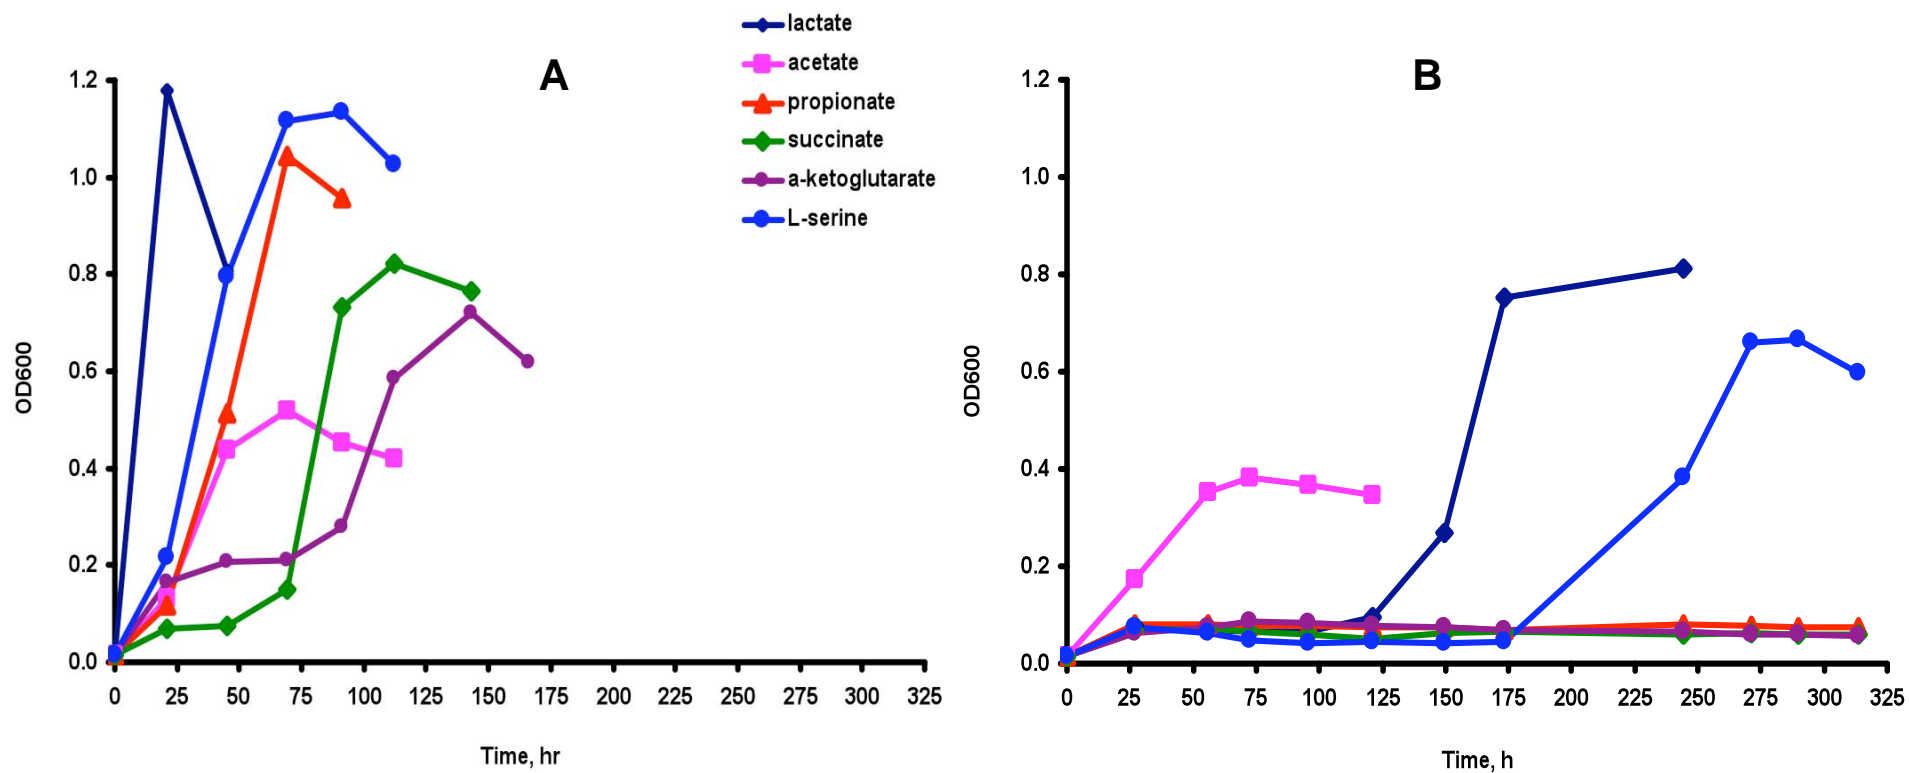

Figure S6. Growth of *S. oneidensis* MR-1 wild-type (A) and  $\Delta SO3471$  mutant (B) in M1 medium supplemented with different compounds as sole sources of carbon and energy. Crimp-sealed serum bottles were used for cultivation, and starting OD<sub>600</sub> value was 0.015 for all experiments.
