# Supplementary material for: Constraint-Based Model of Shewanella oneidensis MR-1 Metabolism: A Tool for Data Analysis and Hypothesis Generation
Source: PLoS Comput Biol. 2010 Jun 24;6(6):e1000822. doi: 10.1371/journal.pcbi.1000822 (PMC2891590; doi:10.1371/journal.pcbi.1000822)
Supplement: Table S1 — Biomass composition used to generate the biomass equation. (0.02 MB XLS) [file pcbi.1000822.s001.xls]

## Sheet: Table 3
Table S1. Biomass composition used to generate the biomass equation. Stoichiometric oefficients correspond to values in mmol/gAFDW column
Macromolecules	Abbreviation	mmol/g AFDW	MW	g/g AFDW	Comments
Protein	protein_Son_aerobic	0.000487454	1.08338e+06	0.5281	Composition and Abundance Measured in this Study
Carbohydrate	glycogen	0.472431	162.14	0.0766	Abundance Measured in this Study
RNA	rna_son	0.00281753	32013.8	0.0902	Abundance Measured in this Study (Composition estimated from GC content in genome)
DNA	dna_son	0.00160753	30792.5	0.0495	Abundance Measured in this Study (Composition estimated from GC content in genome)
LPS	lps_SO	0.0111395	3052.2	0.034	Assumed abundance similar to E.coli, structure is specific to MR-1
Peptidoglycan	peptx	0.0277812	899.89	0.025	Assumed structure and abundance similar to E.coli
Phosphatidylethanolamine	pe	0.069393	690.347	0.0479052	Composition and Abundance Measured in this Study
Phosphatidylglycerol	pgly	0.020076	720.347	0.0144617	Composition and Abundance Measured in this Study
1,2-Diacyl-sn-glycerol 3-phosphate	12dag3p	6.9e-05	645.261	4.4523e-05	Composition and Abundance Measured in this Study
Acyl-glycerophosphoethanolamine	agpe	0.010152	452.744	0.00459626	Composition and Abundance Measured in this Study
Acyl-glycerophosphoglycerol	agpg	0.000421	482.744	0.000203235	Composition and Abundance Measured in this Study
1,2-Diacylglycerol	12dgr	0.123001	567.299	0.0697783	Composition and Abundance Measured in this Study
Small Molecules	Abbreviation	mmol/g AFDW	MW	g/g AFDW	Comments
5-Methyltetrahydrofolate	5mthf	0.05	458.462	0.0229231	Assumed similar to E.coli
Acetyl-CoA	accoa	5e-05	805.548	4.02774e-05	Assumed similar to E.coli
AMP	amp	0.001	345.216	0.000345216	Assumed similar to E.coli
Coenzyme A	coa	6e-06	763.512	4.58107e-07	Assumed similar to E.coli
NAD	nad	0.00215	662.428	0.00142422	Assumed similar to E.coli
NADH	nadh	5e-05	663.436	3.31718e-05	Assumed similar to E.coli
NADP	nadp	0.00013	740.39	9.62507e-05	Assumed similar to E.coli
NADPH	nadph	0.0004	741.398	0.000296559	Assumed similar to E.coli
Putrescine	ptrc	0.035	90.172	0.00315602	Assumed similar to E.coli
Spermidine	spmd	0.007	148.276	0.00103793	Assumed similar to E.coli
Succinyl-CoA	succoa	3e-06	862.576	2.58773e-06	Assumed similar to E.coli
FAD	FAD	5e-05	783.548	3.91774e-05	Assumed similar to E.coli
UDPglucose	udpg	0.003	564.286	0.00169286	Assumed similar to E.coli
Biomass Equation, without Growth Rate Dependent ATP Requirement (GAR):
[c] : (0.000069) 12dag3p + (0.123001) 12dgr + (0.05) 5mthf + (0.00005) accoa + (0.010152) agpe + (0.000421) agpg + (0.001) amp + (0.000006) coa + (0.001608) dna_Son + (0.00005) fad + (0.472431) glycogen + (0.01114) lps_SO + (0.00215) nad + (0.00005) nadh + (0.00013) nadp + (0.0004) nadph + (0.069393) pe + (0.027781) peptx + (0.020076) pgly + (0.000487) protein_Son_aerobic + (0.035) ptrc + (0.0028…
Amino Acid Composition (used in PROTSYN reaction, Supp Table 1)
Amino Acid	Abbreviation	mmol/g cells	Comment
L-Alanine	ala-L	0.5701
L-Arginine	arg-L	0.2362
L-Asparagine	asn-L	0.2668	Total asp+asn was measured and relative amounts of each amino acid was based on their relative abundance in protein sequences
L-Aspartate	asp-L	0.3473	Total asp+asn was measured and relative amounts of each amino acid was based on their relative abundance in protein sequences
L-Cysteine	cys-L	0.0563	Estimated based on amount of other amino acids and relative abundance of cyst-L to other amino acids in protein sequences
L-Glutamine	gln-L	0.2759	Total glu+gln was measured and relative amounts of each amino acid was based on their relative abundance in protein sequences
L-Glutamate	glu-L	0.3224	Total glu+gln was measured and relative amounts of each amino acid was based on their relative abundance in protein sequences
Glycine	gly	0.4917
L-Histidine	his-L	0.0933
L-Isoleucine	ile-L	0.2663
L-Leucine	leu-L	0.4092
L-Lysine	lys-L	0.2658
L-Methionine	met-L	0.1353	Estimated based on amount of other amino acids and relative abundance of met-L to other amino acids in protein sequences
L-Phenylalanine	phe-L	0.1738
L-Proline	pro-L	0.2295
L-Serine	ser-L	0.3148
L-Threonine	thr-L	0.298
L-Tryptophan	trp-L	0.0658	Estimated based on amount of other amino acids and relative abundance of trp-L to other amino acids in protein sequences
L-Tyrosine	tyr-L	0.133
L-Valine	val-L	0.3137
