# Supplementary material for: Constraint-Based Model of Shewanella oneidensis MR-1 Metabolism: A Tool for Data Analysis and Hypothesis Generation
Source: PLoS Comput Biol. 2010 Jun 24;6(6):e1000822. doi: 10.1371/journal.pcbi.1000822 (PMC2891590; doi:10.1371/journal.pcbi.1000822)
Supplement: Table S4 — Reactions used in the smallest 130 futile cycles. (0.02 MB XLS) [file pcbi.1000822.s004.xls]

## Sheet: Table 4
Supp Table 4. Reactions used in the first 130 futile cycles.
Futile Cycle
DAGK,PAP
GBEZ,GLCGSD
GLNS,GLUN
CYTDK1,NTD4
NTD2,URIK1
INSK,NTD11
NTD5,TMDK1
DURIK1,NTD1
ADNK1,NTD7
GSNK,NTD9
PPC,PPCK
FTHFD,FTHFL
ADK1,NTPP6,PPA
ATPS4r,PIabc,PIt6
FTHFD,GARFT,GART
G6PDA,GF6PTA,GLNS
MALS,MALTK,MCAL
ATPS4r,Kt2i,Kt3
ATPS4r,PTRCabc,PTRCt2
ADK1,PPS,PYK
ATPS4r,COBALTt3,COBALTt5
CYTDK2,NDPK1,NTD4
ATPS4r,MGt3,MGt5
NDPK1,NTD2,URIK2
ATPS4r,THD2,THD5
ADK1,ADK3,NTD2,URIK2
ADK1,ADK4,NTD2,URIK3
DTMPK,NDPK4,NTPP7,PPA
CYTK2,NDPK7,NTPP3,PPA
ADK1,ADK3,CYTDK2,NTD4
DUTPDP,NDPK6,PPA,URIDK2
ADK1,ADK4,CYTDK3,NTD4
COBALTt3,COBALTt5,PIabc,PIt6
ATPS4r,ICDHxi,ICDHy,THD2
Kt2i,Kt3,PTRCabc,PTRCt2
GLCP,GLCS1,GLGC,PPA
Kt2i,Kt3,PIabc,PIt6
PTRCabc,PTRCt2,THD2,THD5
DUTPDP,NDPK6,PPA,URIDK3
ADK3,NDPK1,PPS,PYK
COBALTt3,COBALTt5,PTRCabc,PTRCt2
MGt3,MGt5,PTRCabc,PTRCt2
ADK3,NDPK1,NTPP6,PPA
DADK,NDPK8,NTPP5,PPA
MGt3,MGt5,PIabc,PIt6
DGK1,NDPK5,NTPP1,PPA
CYTK1,NDPK3,NTPP4,PPA
NDPK2,NTPP8,PPA,UMPK
GK1,NDPK1,NTPP2,PPA
PIabc,PIt6,THD2,THD5
ACCOAC,ACOATA,HCO3E,MACPD,MCOATA
ADK1,ADK3,GK1,NTPP2,PPA
ATPS4r,GLNS,GLUDx,GLUSy,THD2
ADK1,ASNN,ASNS1,GLNS,PPA
ADK3,ADK4,NDPK1,NTD2,URIK3
ICDHxi,ICDHy,PIabc,PIt6,THD2
ACKr,ACS,ADK1,PPA,PTAr
ICDHxi,ICDHy,PTRCabc,PTRCt2,THD2
ADK3,ADK4,CYTDK3,NDPK1,NTD4
ADK1,ADK3,EPPP2,G35DP,GTPDPK,PPA
ALAD_L,ALATA_L,ATPS4r,GLNS,GLUSy,THD2
ATPS4r,G5SADs,G5SD,GLU5K,P5CD,THD2
ACPS1,ACPSc,ADK1,BPNT,DPCOAK,PPA,PTPATi
ADK1,EPPP2,G35DP,GTPDPK,NDPK1,PPA
ADK3,ASNN,ASNS1,GLNS,NDPK1,PPA
ADK1,MDH,ME2,PPC,PPS,THD5
GLNS,GLUDx,GLUSy,PIabc,PIt6,THD2
ACKr,ACS,ADK3,NDPK1,PPA,PTAr
ATPS4r,GLNS,GLUSy,ILEDH2,ILETA,THD2
GLNS,GLUDx,GLUSy,PTRCabc,PTRCt2,THD2
ADK3,EPPP2,G35DP,GTPDPK,NDPK1,PPA
ATPS4r,GLNS,GLUSy,LEUTA,LLEUDr,THD2
ATPS4r,GLNS,GLUSy,THD2,VALDHr,VALTA
ADK1,NTD2,PPA,PPM,PRPPS,PYNP2,UPPRT
G5SADs,G5SD,GLU5K,P5CD,PIabc,PIt6,THD2
ADK1,ICDHxi,ICDHy,MDH,ME2,PPC,PPS
ADK1,GUAPRT,NTD9,PPA,PPM,PRPPS,PUNP3
GLNS,GLUSy,PIabc,PIt6,THD2,VALDHr,VALTA
G5SADs,G5SD,GLU5K,P5CD,PTRCabc,PTRCt2,THD2
GLNS,GLUSy,LEUTA,LLEUDr,PTRCabc,PTRCt2,THD2
GLNS,GLUSy,ILEDH2,ILETA,PTRCabc,PTRCt2,THD2
ADK3,MDH,ME2,NDPK1,PPC,PPS,THD5
ALAD_L,ALATA_L,GLNS,GLUSy,PIabc,PIt6,THD2
ADK1,ADPT,NTD7,PPA,PPM,PRPPS,PUNP1
ADK1,HXPRT,NTD11,PPA,PPM,PRPPS,PUNP5
GLNS,GLUSy,ILEDH2,ILETA,PIabc,PIt6,THD2
GLNS,GLUSy,PTRCabc,PTRCt2,THD2,VALDHr,VALTA
GLNS,GLUSy,LEUTA,LLEUDr,PIabc,PIt6,THD2
ALAD_L,ALATA_L,GLNS,GLUSy,PTRCabc,PTRCt2,THD2
ALATA_L,GLYCKb,GLYD,PGCD,PGM,PSERT,PSP_L,SPA
ADK3,ADPT,NDPK1,NTD7,PPA,PPM,PRPPS,PUNP1
ADK1,GLNS,GLUDx,GLUSy,MDH,ME2,PPC,PPS
ADK3,ICDHxi,ICDHy,MDH,ME2,NDPK1,PPC,PPS
ADK3,HXPRT,NDPK1,NTD11,PPA,PPM,PRPPS,PUNP5
ACPS1,ACPSc,ADK3,BPNT,DPCOAK,NDPK1,PPA,PTPATi
ADK3,NDPK1,NTD2,PPA,PPM,PRPPS,PYNP2,UPPRT
ADK3,GUAPRT,NDPK1,NTD9,PPA,PPM,PRPPS,PUNP3
ALAD_L,GLUDx,GLYCKb,GLYD,PGCD,PGM,PSERT,PSP_L,SPA
CTPS2,CYTD,GLNS,NDPK2,NTD4,NTPP4,PPA,UMPK,URIK1
CTPS2,CYTD,CYTK1,GLNS,NDPK2,NDPK3,NTD4,UMPK,URIK1
ADK1,ENO,GLUDx,PGCD,PGM,PPS,PSERT,PSP_L,SERD_L
ADK1,ALAD_L,ALATA_L,GLNS,GLUSy,MDH,ME2,PPC,PPS
ADK3,GLNS,GLUDx,GLUSy,MDH,ME2,NDPK1,PPC,PPS
ADK1,G5SADs,G5SD,GLU5K,MDH,ME2,P5CD,PPC,PPS
ADK1,GLNS,GLUSy,ILEDH2,ILETA,MDH,ME2,PPC,PPS
ADK1,GLNS,GLUSy,LEUTA,LLEUDr,MDH,ME2,PPC,PPS
ADK1,GLNS,GLUSy,MDH,ME2,PPC,PPS,VALDHr,VALTA
ALAD_L,GLYCKb,GLYD,ILEDH2,ILETA,PGCD,PGM,PSERT,PSP_L,SPA
ALAD_L,GLYCKb,GLYD,LEUTA,LLEUDr,PGCD,PGM,PSERT,PSP_L,SPA
ALAD_L,GLYCKb,GLYD,PGCD,PGM,PSERT,PSP_L,SPA,VALDHr,VALTA
ADK3,ENO,GLUDx,NDPK1,PGCD,PGM,PPS,PSERT,PSP_L,SERD_L
ADK1,ENO,ILEDH2,ILETA,PGCD,PGM,PPS,PSERT,PSP_L,SERD_L
ADA,ADSL1r,ADSS,ASPTA1,FUM,GLUDx,INSK,MDH,NDPK1,NTD7
CTPS2,CYTD,CYTK1,GLNS,NDPK1,NDPK2,NDPK3,NTD4,UMPK,URIK2
ADK1,ENO,LEUTA,LLEUDr,PGCD,PGM,PPS,PSERT,PSP_L,SERD_L
ADK1,ENO,PGCD,PGM,PPS,PSERT,PSP_L,SERD_L,VALDHr,VALTA
ADK3,GLNS,GLUSy,ILEDH2,ILETA,MDH,ME2,NDPK1,PPC,PPS
ADK3,GLNS,GLUSy,LEUTA,LLEUDr,MDH,ME2,NDPK1,PPC,PPS
ADK3,GLNS,GLUSy,MDH,ME2,NDPK1,PPC,PPS,VALDHr,VALTA
ADK3,G5SADs,G5SD,GLU5K,MDH,ME2,NDPK1,P5CD,PPC,PPS
ADA,ADSL1r,ADSS,ASPTA1,FUM,ILEDH2,ILETA,INSK,MDH,NDPK1,NTD7
ADA,ADSL1r,ADSS,ASPTA1,FUM,INSK,LEUTA,LLEUDr,MDH,NDPK1,NTD7
ADK1,ADK4,CTPS2,CYTD,GLNS,NDPK2,NTD4,NTPP4,PPA,UMPK,URIK3
ADK3,ENO,LEUTA,LLEUDr,NDPK1,PGCD,PGM,PPS,PSERT,PSP_L,SERD_L
ADK1,ADK4,CTPS2,CYTD,CYTK1,GLNS,NDPK2,NDPK3,NTD4,UMPK,URIK3
ADA,ADSL1r,ADSS,ASPTA1,FUM,INSK,MDH,NDPK1,NTD7,VALDHr,VALTA
CTPS2,CYTD,GLNS,NDPK1,NDPK2,NTD4,NTPP4,PPA,UMPK,URIK2
ADK1,ADK3,CTPS2,CYTD,CYTK1,GLNS,NDPK2,NDPK3,NTD4,UMPK,URIK2
ADA,ADK1,ADK3,ADSL1r,ADSS,ASPTA1,FUM,GLUDx,INSK,MDH,NTD7
ADK3,ENO,NDPK1,PGCD,PGM,PPS,PSERT,PSP_L,SERD_L,VALDHr,VALTA
