# Supplementary material for: Constraint-Based Model of Shewanella oneidensis MR-1 Metabolism: A Tool for Data Analysis and Hypothesis Generation
Source: PLoS Comput Biol. 2010 Jun 24;6(6):e1000822. doi: 10.1371/journal.pcbi.1000822 (PMC2891590; doi:10.1371/journal.pcbi.1000822)
Supplement: Table S5 — The 33 model predicted carbon sources. (0.02 MB XLS) [file pcbi.1000822.s005.xls]

## Sheet: Table 5
Supp Table 5. The 33 model predicted carbon sources. The following are reported: predicted biomass yields (assuming no oxygen limitations); oxygen requirements (mmol O2 needed/mmol carbon source or mmol O2 needed/mmol electron equivalent); and comparison with experimental data. References to other papers correspond to PubMed IDs. All simulations used a maximum carbon uptake rate = 10 mmol/gAFDW/h…
Carbon Source	Abbreviation	BiomassYield (gAFDW/ mmol carbon source)	O2 Requirement (mmolO2/ mmol carbon source)	O2 Requirement (mmolO2/ mmol electron equiv.)	Comment	Source of Experimental Evidence
Acetate	ac	0.0132	1.4034	0.2005	Growth	PMID: 16788168, This study
N-Acetyl-D-glucosamine	acgam	0.0643	5.0894	0.159	Growth	PMID: 18546496
2-Oxoglutarate	akg	0.0326	2.5244	0.1803	Weak	This Study
D-Alanine	ala-D	0.0235	1.9367	0.1614	Untested
L-Alanine	ala-L	0.0235	1.9367	0.1614	Weak	This Study
L-Arginine	arg-L	0.0413	3.6302	0.1578	Untested
L-Aspartate	asp-L	0.0234	1.943	0.1766	No Growth	This Study
Cytidine	cytd	0.0458	2.9522	0.0984	Untested
Deoxycytidine	dcyt	0.0497	3.2805	0.1025	Untested
Deoxyuridine	duri	0.0491	3.3072	0.1034	Untested
Ethanol	etoh	0.0234	1.9396	0.1616	Mixed Results	PMID: 8195102, this study
Formate	for	0.0035	0.3401	0.3401	Mixed Results	PMID: 8195102, this study
Fumarate	fum	0.024	1.9162	0.1916	Growth	This Study
L-Glutamine	gln-L	0.0368	2.8339	0.1574	Growth	This Study
L-Glutamate	glu-L	0.0366	2.8419	0.1672	Growth	This Study
Glycine	gly	0.0118	0.9649	0.1608	No Growth	This Study
gly-asp-L	gly-asp-L	0.0356	2.8902	0.17	Growth	PMID: 16788168 (Biolog Data)
gly-glu-L	gly-glu-L	0.0477	3.8409	0.167	Growth	PMID: 16788168 (Biolog Data)
(R)-Glycerate	glyc-R	0.0198	1.6047	0.1783	Untested
Glycolate	glyclt	0.0107	1.0163	0.2033	Untested
hexadecanoate (n-C16:0)	hdca	0.1601	15.7573	0.1694	Untested
D-Lactate	lac-D	0.0212	2.042	0.1856	Growth	PMID: 19196979
L-Lactate	lac-L	0.0212	2.042	0.1856	Growth	PMID: 19196979,16788168, and this study
L-Malate	mal-L	0.024	1.9162	0.1916	Growth	This Study
octadecanoate (n-C18:0)	ocdca	0.1812	17.7992	0.1695	Untested
L-Ornithine	orn-L	0.0355	3.8953	0.1694	Untested
Propionate	ppa	0.0228	2.4674	0.1898	Growth	This Study
Putrescine	ptrc	0.0348	3.9269	0.1636	Untested
Pyruvate	pyr	0.0195	1.6157	0.1795	Growth	PMID: 16788168, and this study
L-Serine	ser-L	0.0199	1.6009	0.1601	Growth	PMID: 8195102, and this study
Succinate	succ	0.0256	2.341	0.1951	Growth	This Study
tetradecanoate (C14:0)	ttdca	0.1386	13.7274	0.1695	Untested
Uridine	uri	0.0452	2.9799	0.0993	Growth	PMID: 16788168 (Biolog Data)
Other Compounds Not Predicted by Model to Support Growth
Asparagine	asn-L	0	0	0	Weak	This Study (No growth in plate, some growth after 4 days in culture tube)
Threonine	thr-L	0	0	0	Growth	This Study (thr-L uptake transporter is needed in model to allow for growth)
Adenosine	adn	0	0	0	Growth	PMID: 16788168 (hxan transporter is needed in model to allow for growth)
Deoxyadenosine	dad-2	0	0	0	Growth	PMID: 16788168 (hxan transporter is needed in model to allow for growth)
Inosine	ins	0	0	0	Growth	PMID: 18546496 (hxan transporter is needed in model to allow for growth)
